# Supplementary material for: Associations between meteorological factors and pregnancy complications during different pregnancy trimesters: a multicenter retrospective study in eastern China
Source: PeerJ journal article supplement (doi:10.7717/peerj.19621), 2025-06-27
Supplement: codebook.pdf [file codebook.pdf]

# Categorical data codebook

## Code for gravity

| Value | Meaning of Value                     | Description |
|-------|--------------------------------------|-------------|
| 1     | Once                                 | None        |
| 2     | Twice                                | None        |
| 3     | Greater than or equal to three times | None        |

## Code of parity

| Value | Meaning of Value | Description |
|-------|------------------|-------------|
| 1     | Primiparous      | None        |
| 2     | Multiparous      | None        |

## Code of season of conception

| Value | Meaning of Value | Description        |
|-------|------------------|--------------------|
| 1     | Spring           | March–May          |
| 2     | Summer           | June–August        |
| 3     | Fall             | September–November |
| 4     | Winter           | December–February  |

## Code of residence

| Value | Meaning of Value | Description |
|-------|------------------|-------------|
| 1     | Residents        | None        |
| 2     | Immigrants       | None        |

## Code of fetal gender

| Value | Meaning of Value | Description |
|-------|------------------|-------------|
| 0     | Missing          | None        |
| 1     | Male             | None        |
| 2     | Female           | None        |

## Code of GDM

| Value | Meaning of Value | Description                        |
|-------|------------------|------------------------------------|
| 0     | Non-GDM          | None                               |
| 1     | GDM              | Gestational diabetes mellitus, GDM |

## Code of GH

| Value | Meaning of Value | Description                  |
|-------|------------------|------------------------------|
| 0     | Non-GH           | None                         |
| 1     | GH               | Gestational hypertension, GH |

Code of PE

| Value | Meaning of Value | Description      |
|-------|------------------|------------------|
| 0     | Non-PE           | None             |
| 1     | PE               | Preeclampsia, PE |

Code of hypothyroidism

| Value | Meaning of Value   | Description |
|-------|--------------------|-------------|
| 0     | Non-hypothyroidism | None        |
| 1     | hypothyroidism     | None        |
